# Supplementary material
Source: PubMed Central journal article supplement (PMC4784540)
Supplement: kitg001979.wt1_default.pdf [file kitg001979.wt1_default.pdf]

Supplementary Table A: Methodology of literature search for the construction of the evidence map. All information sources were queried for studies published from 2005 up to February 2011.

| Source                                                                                                                    | Universal Resource Locator                                                                                                                                                                | Search strategy                                                                                                                                                                             | Inclusion criteria                                                                                                                                                                                                                                                                                         | Data extraction                                                                                                                                                                                                                                                                                                                                                                                                                                                                                                                                                                                                |
|---------------------------------------------------------------------------------------------------------------------------|-------------------------------------------------------------------------------------------------------------------------------------------------------------------------------------------|---------------------------------------------------------------------------------------------------------------------------------------------------------------------------------------------|------------------------------------------------------------------------------------------------------------------------------------------------------------------------------------------------------------------------------------------------------------------------------------------------------------|----------------------------------------------------------------------------------------------------------------------------------------------------------------------------------------------------------------------------------------------------------------------------------------------------------------------------------------------------------------------------------------------------------------------------------------------------------------------------------------------------------------------------------------------------------------------------------------------------------------|
| HugeNavigator database (pharmacogenetic compendium of studies)                                                            | <a href="http://www.hugenavigator.net/HuGENavigator/home.do">http://www.hugenavigator.net/HuGENavigator/home.do</a>                                                                       | Manual screen of abstracts for all studies annotated as "pharmacogenetic studies" and for all cardiovascular phenotypes under the "Disease" variable in the HuGE Literature Finder database | Eligible studies were studies in humans evaluating association between genetic variants and either surrogate or clinical endpoints for the efficacy or safety of drug treatments (pharmacological interventions). Narrative reviews, commentaries, editorials and studies without abstracts were excluded. | From the abstracts of eligible studies, we extracted information on study design, the drug examined and its corresponding class, the disease defining the population of interest, the outcome (surrogate/clinical), the intended use of the pharmacogenetic association (improvement of efficacy or safety of treatment), and the specific drug-SNP combinations for which a positive association was reported. For all included meta-analyses, RCTs ("repurposed and PGx), cost-effectiveness analyses and guideline articles, we reviewed the full-texts of the respective publications for data extraction. |
| Medline                                                                                                                   | <a href="http://www.ncbi.nlm.nih.gov/mesh">http://www.ncbi.nlm.nih.gov/mesh</a>                                                                                                           | Search with Medical Subject Heading terms: "Pharmacogenetics" and "Cardiovascular Disease"                                                                                                  |                                                                                                                                                                                                                                                                                                            |                                                                                                                                                                                                                                                                                                                                                                                                                                                                                                                                                                                                                |
| National Human Genome Research Institute catalogue of genome-wide association studies                                     | <a href="http://www.genome.gov/gwastudies">www.genome.gov/gwastudies</a>                                                                                                                  | Manual search of the "disease/trait" variable string for cardiovascular pharmacogenomic phenotypes                                                                                          |                                                                                                                                                                                                                                                                                                            |                                                                                                                                                                                                                                                                                                                                                                                                                                                                                                                                                                                                                |
| Cost-Effectiveness Analysis Registry                                                                                      | www.cearegistry.org                                                                                                                                                                       | Search for "gene" or "genetic" or "pharmacogenetic" or "pharmacogenomic" for cardiovascular pharmacogenomic cost-effectiveness analyses                                                     |                                                                                                                                                                                                                                                                                                            |                                                                                                                                                                                                                                                                                                                                                                                                                                                                                                                                                                                                                |
| FDA Table of Pharmacogenomic Biomarkers in Drug Labels                                                                    | <a href="http://www.fda.gov/drugs/scienceresearch/researchareas/pharmacogenetics/ucm083378.htm">http://www.fda.gov/drugs/scienceresearch/researchareas/pharmacogenetics/ucm083378.htm</a> | Manual search for all cardiovascular drugs                                                                                                                                                  |                                                                                                                                                                                                                                                                                                            |                                                                                                                                                                                                                                                                                                                                                                                                                                                                                                                                                                                                                |
| National Guideline Clearinghouse, Agency for Healthcare Research and Quality (Repository of Clinical Practice Guidelines) | <a href="http://www.Guidelines.gov">www.Guidelines.gov</a>                                                                                                                                | Manual search for cardiovascular disease clinical practice guidelines                                                                                                                       |                                                                                                                                                                                                                                                                                                            |                                                                                                                                                                                                                                                                                                                                                                                                                                                                                                                                                                                                                |

Abbreviations: RCTs, randomized clinical trials; PGx: pharmacogenomics
