# Supplementary material
Source: PubMed Central journal article supplement (PMC4784540)
Supplement: kitg001979.wt2_default.pdf [file kitg001979.wt2_default.pdf]

Supplementary Table 2. “Repurposed” randomized clinical trials examining treatment-by-genotype pharmacogenetic interactions. This list was created by exploring the basic biomedical research literature (272 studies: candidate gene and genome-wide association studies) for “repurposed” or “effect modification” randomised trials—that is, studies that genotyped stored samples of participants in placebo controlled trials of cardiovascular drugs and thus enabled a test of the interaction between genotype and treatment that provides a higher level of evidence than conventional treatment only analyses. Genes with statistically significant results are shown in bold. Genes with “confirmed” pharmacogenetic associations based on our literature review criteria are denoted with an asterisk. As shown below, we identified 20 studies stemming from 13 unique trials; of 11 significant associations based on interaction tests, only one (*LDLR* pravastatin) met our criteria for “confirmation.”

| Drug                   | RCT acronym    | Reference | Gene                 | Intended use                                                                                                                                                                        | Result                                                                                                                                                                        |
|------------------------|----------------|-----------|----------------------|-------------------------------------------------------------------------------------------------------------------------------------------------------------------------------------|-------------------------------------------------------------------------------------------------------------------------------------------------------------------------------|
| Bucindolol             | BEST           | 18953265  | <b><i>EDN1</i></b>   | Efficacy: prevention of heart failure hospitalization or all-cause death                                                                                                            | 2 <i>EDN1</i> SNPs (rs2071942 and rs5370) with significant treatment–genotype interactions for the combined outcome of first heart failure hospitalization or all-cause death |
|                        | BEST           | 19880803  | <b><i>ADRA2A</i></b> | Efficacy: sympatholytic response; all-cause mortality, time to all-cause mortality or cardiac transplantation, and left ventricular ejection fraction change measured at 12 months. | Significant interaction test for the Del322-325 polymorphism for sympatholytic response at 3 months. No significant findings for the clinical endpoints                       |
|                        | BEST           | 16844790  | <i>ADRB1</i> *       | Efficacy: prevention of heart failure hospitalization or all-cause death                                                                                                            | Non-significant test for interaction                                                                                                                                          |
| Isosorbide/Hydralazine | GRAHF (A-HeFT) | 19327620  | <i>NOS3</i>          | Efficacy: event-free survival and composite score of survival, hospitalization, and quality of life                                                                                 | Non-significant tests for interaction for 3 SNPs                                                                                                                              |

|             |                         |          |                                                                               |                                                                                                                 |                                                                                                                   |
|-------------|-------------------------|----------|-------------------------------------------------------------------------------|-----------------------------------------------------------------------------------------------------------------|-------------------------------------------------------------------------------------------------------------------|
| Losartan    | GENRES                  | 19593208 | <i>CYP2C9</i>                                                                 | Efficacy: blood pressure response                                                                               | Non-significant test for interaction                                                                              |
| Perindopril | PERGENE                 | 19082699 | <i>AGT, REN, ACE, AGTR1, AGTR2, CYP11B, KLK, KNG, BDKR1, BDKR2, NOS3</i>      | Efficacy: prevention of composite outcome of cardiovascular mortality, myocardial infarction, or cardiac arrest | Significant interaction tests for <i>AGTR1</i> and <i>BDKR1</i> SNPs                                              |
| Pravastatin | GISSI-Prevenzione study | 17567623 | <i>APOE*</i>                                                                  | Efficacy: mortality                                                                                             | Non-significant test for interaction                                                                              |
|             | GenHAT (ALLHAT)         | 17174637 | <i>ACE</i>                                                                    | Efficacy: reduction in mortality and in composite cardiovascular outcome                                        | Non-significant test for interaction                                                                              |
|             | CARE, WOSCOPS           | 18174457 | <b><i>ADAMTS1</i></b>                                                         | Efficacy: prevention of fatal coronary disease and non-fatal myocardial infarction                              | Significant interaction test for 1 SNP (rs428785)                                                                 |
|             | PROSPER                 | 18262190 | <i>PCSK9</i>                                                                  | Efficacy: lipid response, prevention of coronary heart disease development                                      | Non-significant test for interaction                                                                              |
|             | PROSPER                 | 18261733 | <b><i>LDLR*</i></b> , <i>HMGCR</i>                                            | Efficacy: lipid response, prevention of coronary heart disease development                                      | Significant test for interaction for 1 <i>LDLR</i> SNP (C44857T) for lipid response                               |
|             | GenHAT (ALLHAT)         | 19415820 | <i>F2, F5, F7, F12, F13</i>                                                   | Efficacy: reduction in mortality and in composite cardiovascular outcome                                        | Significant tests for interaction with the composite cardiovascular outcome for 2 <i>F5</i> SNPs (rs6025, rs6046) |
|             | PROSPER                 | 19752398 | <b><i>NPC1L1</i></b>                                                          | Efficacy: lipid response, prevention of coronary heart disease development                                      | Significant test for interaction for 1 <i>NPC1L1</i> SNP (rs17655652) for lipid response                          |
|             | CARE, WOSCOPS           | 17008591 | <b><i>FCAR</i></b>                                                            | Efficacy: prevention of fatal coronary disease and non-fatal myocardial infarction                              | Significant test for interaction for 1 SNP (Asp92Asn)                                                             |
|             | CARE                    | 20403483 | <b><i>KIF6</i></b>                                                            | Efficacy: prevention of fatal coronary disease and non-fatal myocardial infarction                              | Significant test for interaction for 1 SNP (rs20455)                                                              |
| Fluvastatin | ALERT                   | 17563401 | <i>ABCB1, ACE, ADRB2, AGER, AGT, AGTR1, BCL2, BCL2L1, CCL2, CETP, CYP2C9,</i> | Efficacy: lipid response                                                                                        | Non-significant tests for interaction                                                                             |

|              |                |          |                                                    |                                                                      |                                       |
|--------------|----------------|----------|----------------------------------------------------|----------------------------------------------------------------------|---------------------------------------|
|              |                |          | <i>HMGCR, HMOX1, IL6, IL6R, LPL, MMP3, SLC01B1</i> |                                                                      |                                       |
| ximelagatran | THRIVE III     | 16512831 | <i>F5, F2</i>                                      | Efficacy: prevent thromboembolism; Safety: bleeding                  | Non-significant tests for interaction |
| Clopidogrel  | CHARISMA       | NA       | <i>CYP2C19*</i>                                    | Efficacy: composite cardiovascular outcome<br>Safety: major bleeding | Non-significant tests for interaction |
|              | CLARITY        | NA       | <i>CYP2C19*</i>                                    | Efficacy: composite cardiovascular outcome                           | Non-significant tests for interaction |
|              | ACTIVE-A, CURE | 20979470 | <i>CYP2C19*</i>                                    | Efficacy: composite cardiovascular outcome<br>Safety: major bleeding | Non-significant tests for interaction |
|              |                |          |                                                    |                                                                      |                                       |

Abbreviations: SNP, single nucleotide polymorphism; NA, non-available.
